# Supplementary material for: Differential gene expression and AKT targeting in triple negative breast cancer
Source: PubMed Central journal article supplement (PMC6633890; doi:10.18632/oncotarget.27026), 2019-07-09
Supplement: oncotarget-10-4356-s001.pdf [file oncotarget-10-4356-s001.pdf]

## Differential gene expression and AKT targeting in triple negative breast cancer

### SUPPLEMENTARY MATERIALS

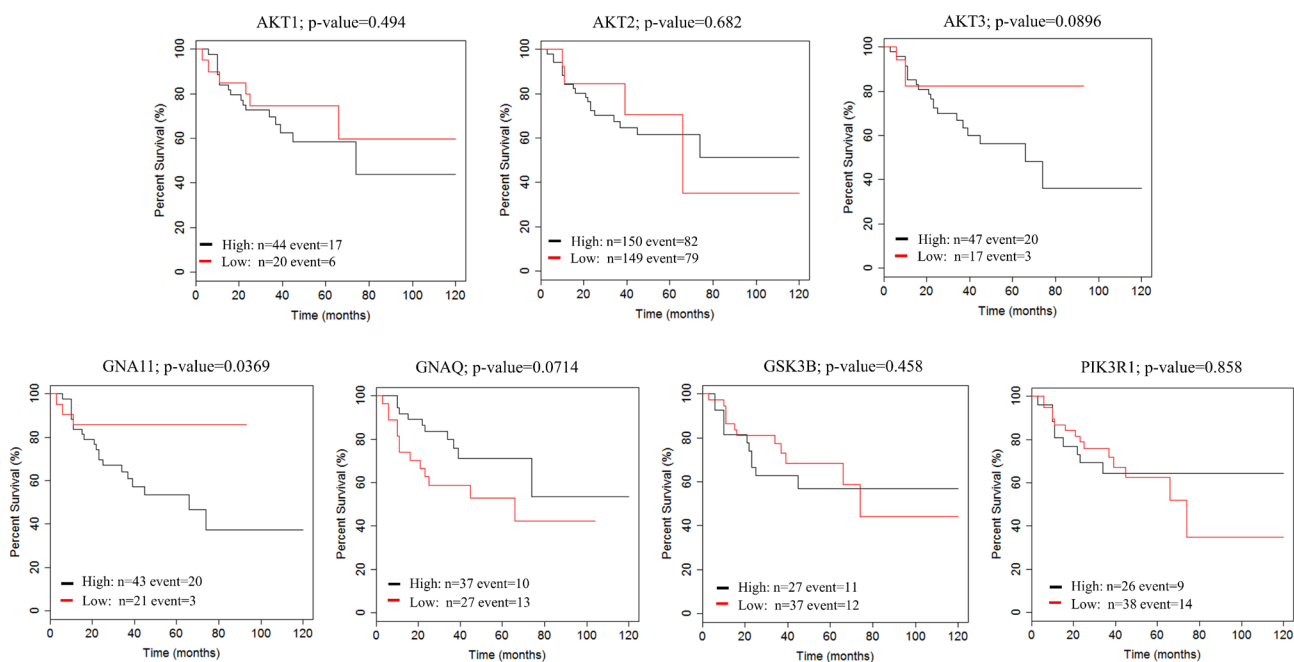

**Supplementary Figure 1: Gene expression level and overall survival in TNBCs from Rody *et al.* ( $N = 64$ ).** Higher expression of AKT3 ( $P = 0.0896$ ) GNA11 ( $P = 0.0369$ ) and GNAQ ( $P = 0.0714$ ) are associated with trends of shorter disease free survival.

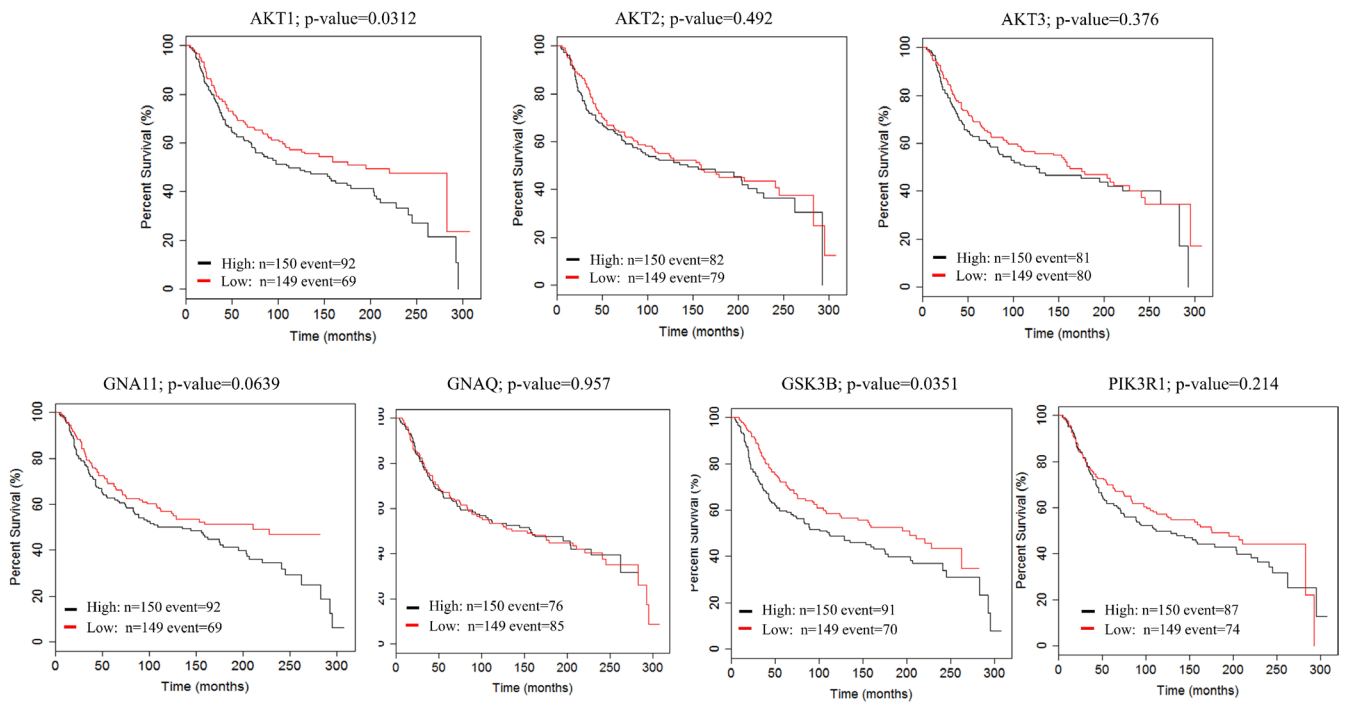

**Supplementary Figure 2: Gene expression level and overall survival in METABRIC TNBCs (N = 299).** Higher expression of AKT1 ( $P = 0.0312$ ), GNA11 ( $P = 0.0639$ ), and GSK3B ( $P = 0.0351$ ) are associated with trends of shorter overall survival.
